# Supplementary material
Source: Springer Nature journal article supplement (https://www.springermedizin.de/resource/supplementary/12963_2011_135_MOESM4_ESM.pdf/9572730)

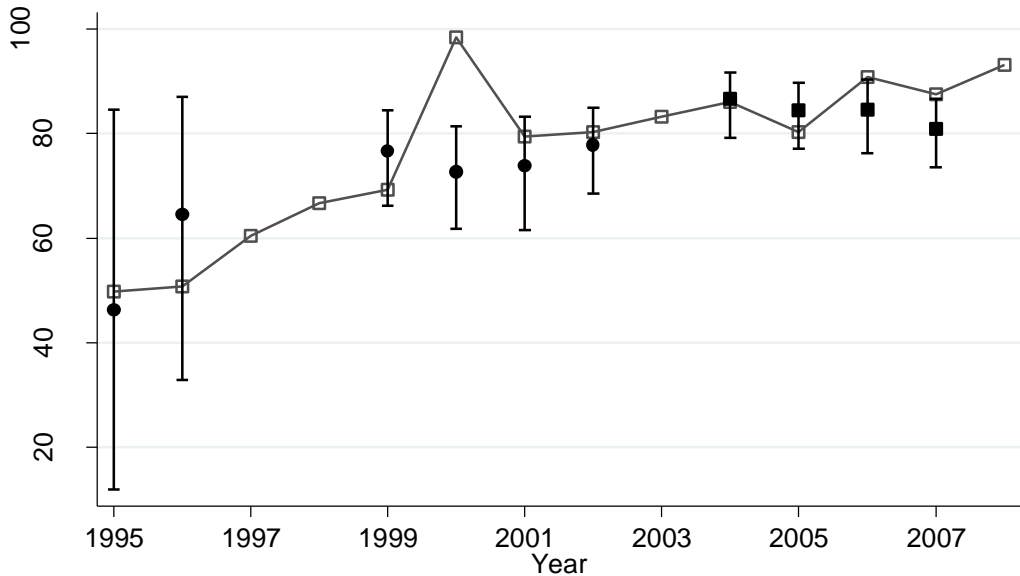

- DHS Estimate with 95% CI
- MICS Estimate with 95% CI
- HIS Data

Supplement: MOESM4 [file 9572730]
